# Supplementary material for: CBPDdb: a curated database of compounds derived from Coumarin–Benzothiazole–Pyrazole
Source: Oxford University Press journal article supplement (doi:10.1093/database/baad062), 2023-01-01
Supplement: baad062_supp.zip [file baad062_supp.zip]

**Compound Tabs:** Coumarin, Benzothiazole, Pyrazole

**Search Bar:** Search:

**Filters:** HBA1, HBA2, HBD, logP, MR, MW, nF, TPSA, Name

**Compound Tabs:** All, All, All, All

**Table 1: Compound Data**

|    | cansmiName                                                                | ChemicalName | cansmi                                                        | formula       | HBA1 | HBA2 | HBD | logP   | MR       | MW        | nF | TPSA   | Name       |
|----|---------------------------------------------------------------------------|--------------|---------------------------------------------------------------|---------------|------|------|-----|--------|----------|-----------|----|--------|------------|
| 1  | CCOc1c2csc(n2)N(c1=O)oc2c1ccc(c2)OC(C1=O)O)C/C CC- 10.mol                 | Coumarin13   | CCOc1c2csc(n2)N(c1=O)oc2c1ccc(c2)OC(C1=O)O)C/C                | C17H16N2O6S   | 7    | 9    | 2   | 3.3305 | 97.2112  | 376.38374 | 0  | 153.12 | CC-10.mol  |
| 2  | Clc1ccc(cc1)C=C1SC=C(N1n1c(C)nn(c1=O)c1cccc2oc1=O)CC- 11a.mol             | Coumarin14   | Clc1ccc(cc1)C=C1SC=C(N1n1c(C)nn(c1=O)c1cccc2oc1=O)            | C28H19ClN4O3S | 5    | 8    | 0   | 5.8492 | 151.423  | 526.99346 | 0  | 98.57  | CC-11a.mol |
| 3  | CCOc1ccc(cc1)n1nc(n(c1=O)N1/C=C1c2cccc2)SC=C1c2cccc2oc1=O)C CC- 11b.mol   | Coumarin15   | CCOc1ccc(cc1)n1nc(n(c1=O)N1/C=C1c2cccc2)SC=C1c2cccc2oc1=O)C   | C29H22N4O4S   | 6    | 9    | 0   | 5.2044 | 152.905  | 522.57438 | 0  | 107.8  | CC-11b.mol |
| 4  | CCOc1ccc(cc1)n1nc(n(c1=O)N1/C=C1c2cccc2)SC=C1c2cccc2oc1=O)C CC- 11c.mol   | Coumarin16   | CCOc1ccc(cc1)n1nc(n(c1=O)N1/C=C1c2cccc2)SC=C1c2cccc2oc1=O)C   | C29H21ClN4O4S | 6    | 9    | 0   | 5.8578 | 157.915  | 557.81944 | 0  | 107.8  | CC-11c.mol |
| 5  | CCOc1ccc(cc1)C=C1SC=C(N1n1c(C)nn(c1=O)c1cccc2oc1=O)CC- 11d.mol            | Coumarin17   | CCOc1ccc(cc1)C=C1SC=C(N1n1c(C)nn(c1=O)c1cccc2oc1=O)           | C30H24N4O4S   | 6    | 9    | 0   | 5.5128 | 157.871  | 536.60096 | 0  | 107.8  | CC-11d.mol |
| 6  | Cc1ccc(cc1)n1nc(n(c1=O)N1/C=C1c2cccc2)SC=C1c2cccc2oc1=O)C CC- 11e.mol     | Coumarin18   | Cc1ccc(cc1)n1nc(n(c1=O)N1/C=C1c2cccc2)SC=C1c2cccc2oc1=O)C     | C29H21ClN4O3S | 5    | 8    | 0   | 6.1576 | 156.389  | 541.02004 | 0  | 98.57  | CC-11e.mol |
| 7  | O=c1cc2c(cc1c1csc(n1)nc(cc1N)cc1cccc1)cc(cc2C(C)C(C)C(C)C)C/C CC- 12a.mol | Coumarin19   | O=c1cc2c(cc1c1csc(n1)nc(cc1N)cc1cccc1)cc(cc2C(C)C(C)C(C)C)C/C | C29H30N4O2S   | 4    | 7    | 1   | 7.5276 | 149.0944 | 498.6391  | 0  | 115.18 | CC-12a.mol |
| 8  | CCN(c1ccc(cc1)c1nn(c1)N)cc1cccc2oc1=O)CC CC- 12b.mol                      | Coumarin20   | CCN(c1ccc(cc1)c1nn(c1)N)cc1cccc2oc1=O)CC                      | C25H23N5O2S   | 5    | 8    | 1   | 5.7788 | 134.3754 | 457.54742 | 0  | 118.42 | CC-12b.mol |
| 9  | Clc1cccc(c1)C=NNc1ccc(n1)c1cc2cccc2oc1=O)Cl CC- 13a.mol                   | Coumarin21   | Clc1cccc(c1)C=NNc1ccc(n1)c1cc2cccc2oc1=O)Cl                   | C19H11ClN3O2S | 4    | 6    | 1   | 5.7423 | 111.0897 | 416.28054 | 0  | 95.73  | CC-13a.mol |
| 10 | O=c1cc2cccc2oc1c1csc(n1)N1N=C1c1ccc(cc1C1N)N=O)O CC- 13b.mol              | Coumarin22   | O=c1cc2cccc2oc1c1csc(n1)N1N=C1c1ccc(cc1C1N)N=O)O              | C19H13ClN4O4S | 6    | 6    | 3   | 4.9965 | 114.6749 | 428.84892 | 0  | 156.88 | CC-13b.mol |

Showing 1 to 10 of 140 entries

[cum2Compounds](#) [cum2SDF](#)

**Table 2: Therapeutic Action and References**

| Name       | Therapeutic.Action | DOI                                                                                                 | References                                                                                                                                                                  |
|------------|--------------------|-----------------------------------------------------------------------------------------------------|-----------------------------------------------------------------------------------------------------------------------------------------------------------------------------|
| CC-10.mol  | anticancer         | <a href="https://doi.org/10.1016/j.ejmc.2022.100038">https://doi.org/10.1016/j.ejmc.2022.100038</a> | <a href="https://www.sciencedirect.com/science/article/pii/S2772417422000103?via%3Dihub">https://www.sciencedirect.com/science/article/pii/S2772417422000103?via%3Dihub</a> |
| CC-11a.mol | anticancer         | <a href="https://doi.org/10.1016/j.ejmc.2022.100038">https://doi.org/10.1016/j.ejmc.2022.100038</a> | <a href="https://www.sciencedirect.com/science/article/pii/S2772417422000103?via%3Dihub">https://www.sciencedirect.com/science/article/pii/S2772417422000103?via%3Dihub</a> |
| CC-11b.mol | anticancer         | <a href="https://doi.org/10.1016/j.ejmc.2022.100038">https://doi.org/10.1016/j.ejmc.2022.100038</a> | <a href="https://www.sciencedirect.com/science/article/pii/S2772417422000103?via%3Dihub">https://www.sciencedirect.com/science/article/pii/S2772417422000103?via%3Dihub</a> |
| CC-11c.mol | anticancer         | <a href="https://doi.org/10.1016/j.ejmc.2022.100038">https://doi.org/10.1016/j.ejmc.2022.100038</a> | <a href="https://www.sciencedirect.com/science/article/pii/S2772417422000103?via%3Dihub">https://www.sciencedirect.com/science/article/pii/S2772417422000103?via%3Dihub</a> |
| CC-11d.mol | anticancer         | <a href="https://doi.org/10.1016/j.ejmc.2022.100038">https://doi.org/10.1016/j.ejmc.2022.100038</a> | <a href="https://www.sciencedirect.com/science/article/pii/S2772417422000103?via%3Dihub">https://www.sciencedirect.com/science/article/pii/S2772417422000103?via%3Dihub</a> |
| CC-11e.mol | anticancer         | <a href="https://doi.org/10.1016/j.ejmc.2022.100038">https://doi.org/10.1016/j.ejmc.2022.100038</a> | <a href="https://www.sciencedirect.com/science/article/pii/S2772417422000103?via%3Dihub">https://www.sciencedirect.com/science/article/pii/S2772417422000103?via%3Dihub</a> |
| CC-12a.mol | anticancer         | <a href="https://doi.org/10.1016/j.ejmc.2022.100038">https://doi.org/10.1016/j.ejmc.2022.100038</a> | <a href="https://www.sciencedirect.com/science/article/pii/S2772417422000103?via%3Dihub">https://www.sciencedirect.com/science/article/pii/S2772417422000103?via%3Dihub</a> |
| CC-12b.mol | anticancer         | <a href="https://doi.org/10.1016/j.ejmc.2022.100038">https://doi.org/10.1016/j.ejmc.2022.100038</a> | <a href="https://www.sciencedirect.com/science/article/pii/S2772417422000103?via%3Dihub">https://www.sciencedirect.com/science/article/pii/S2772417422000103?via%3Dihub</a> |
| CC-13a.mol | anticancer         | <a href="https://doi.org/10.1016/j.ejmc.2022.100038">https://doi.org/10.1016/j.ejmc.2022.100038</a> | <a href="https://www.sciencedirect.com/science/article/pii/S2772417422000103?via%3Dihub">https://www.sciencedirect.com/science/article/pii/S2772417422000103?via%3Dihub</a> |
| CC-13b.mol | anticancer         | <a href="https://doi.org/10.1016/j.ejmc.2022.100038">https://doi.org/10.1016/j.ejmc.2022.100038</a> | <a href="https://www.sciencedirect.com/science/article/pii/S2772417422000103?via%3Dihub">https://www.sciencedirect.com/science/article/pii/S2772417422000103?via%3Dihub</a> |

**MAIN PANEL**

**Full dataset or filtered data with all columns**

**Full dataset in .sdf format**

**Clickable references**

Supplementary Figure 1. The main panel with the available filters.

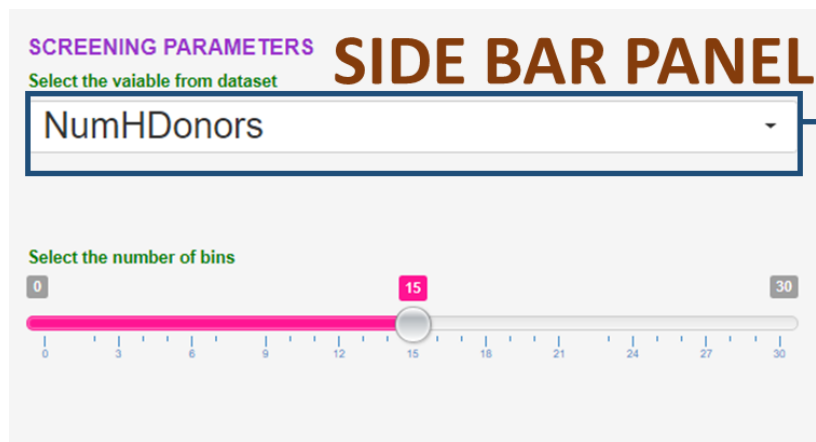

Select the descriptor to visualise the graph

## MAIN PANEL

### 2.Full Dataset Graphical Frequency Analysis of Descriptors

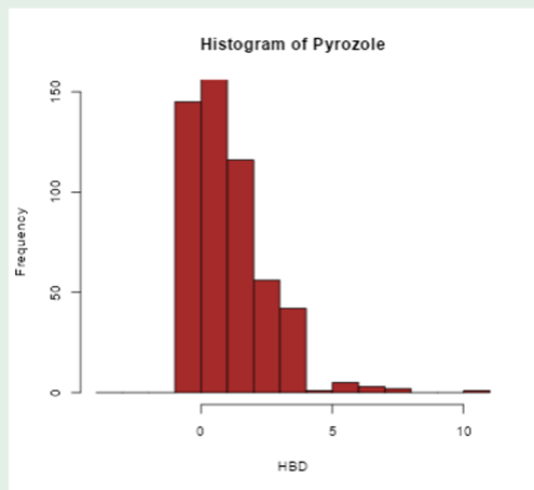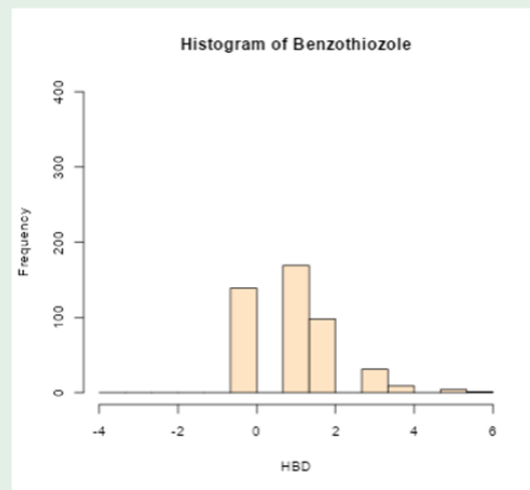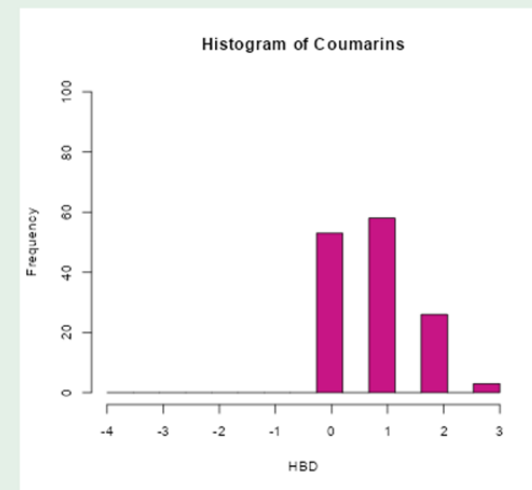

Supplementary Figure 2. Frequency of graphical visualization of the compounds corresponding to the descriptors

Coumarin
Benzothiozole
Pyrazole

Filtered applied: HBA1 > 8

Show 10 entries  
 cansmiName

Search:

formula   HBA1   HBA2   HBD   logP

|     | cansmiName                                                                                                     | ChemicalName | cansmi                                                                                               | formula       | HBA1 | HBA2 | HBD | logP   |
|-----|----------------------------------------------------------------------------------------------------------------|--------------|------------------------------------------------------------------------------------------------------|---------------|------|------|-----|--------|
| 43  | <chem>Cc1ccc(cc1)/N=N/C1SC(=NC1c1cccc1)N1N=C(CC1c1ccc(cc1)/N(C)C)c1c(=O)oc2c(c1O)cccc2 CC-30b.mol</chem>       | Coumarin51   | <chem>Cc1ccc(cc1)/N=N/C1SC(=NC1c1cccc1)N1N=C(CC1c1ccc(cc1)/N(C)C)c1c(=O)oc2c(c1O)cccc2</chem>        | C36H32N6O3S   | 9    | 10   | 1   | 6.7873 |
| 45  | <chem>Clc1ccc(cc1)/N=N/C1SC(=NC1c1cccc1)N1N=C(CC1c1ccc(cc1)/N(C)C)c1c(=O)oc2c(c1O)cccc2 CC-30d.mol</chem>      | Coumarin53   | <chem>Clc1ccc(cc1)/N=N/C1SC(=NC1c1cccc1)N1N=C(CC1c1ccc(cc1)/N(C)C)c1c(=O)oc2c(c1O)cccc2</chem>       | C35H29ClN6O3S | 9    | 10   | 1   | 7.1323 |
| 57  | <chem>COc1c(OC)cc(cc1OC)c1cc(nn1c1ccc(cc1)S(=O)(=O)N)C(=O)OCCOc1ccc2c(c1)oc(=O)cc2 CC-36.mol</chem>            | Coumarin65   | <chem>COc1c(OC)cc(cc1OC)c1cc(nn1c1ccc(cc1)S(=O)(=O)N)C(=O)OCCOc1ccc2c(c1)oc(=O)cc2</chem>            | C30H27N3O10S  | 11   | 13   | 1   | 5.3358 |
| 110 | <chem>CCN(c1ccc2c(c1)oc(=O)c(c2)C(=O)NCCNC(=O)/C(=C/c1cc(OC)c(c(c1)OC)OC)/c1ccc(c(c1)OC)OC)CC CC-81.mol</chem> | Coumarin112  | <chem>CCN(c1ccc2c(c1)oc(=O)c(c2)C(=O)NCCNC(=O)/C(=C/c1cc(OC)c(c(c1)OC)OC)/c1ccc(c(c1)OC)OC)CC</chem> | C36H41N3O9    | 11   | 12   | 2   | 5.5508 |

Showing 1 to 4 of 4 entries (filtered from 140 total entries)

Previous 1 Next

[cum2Compounds](#)
[cum2SDF](#)

Selected column from section 1 displayed in section 3

Download filtered data with all columns

### 3.Extracting cansmi(smiles) Column:Filtered Data

## MAIN PANEL

FilteredCoumarin

Show 10 entries  
 cansmiName

Search:

Cc1ccc(cc1)/N=N/C1SC(=NC1c1cccc1)N1N=C(CC1c1ccc(cc1)/N(C)C)c1c(=O)oc2c(c1O)cccc2 CC-30b.mol

Clc1ccc(cc1)/N=N/C1SC(=NC1c1cccc1)N1N=C(CC1c1ccc(cc1)/N(C)C)c1c(=O)oc2c(c1O)cccc2 CC-30d.mol

COc1c(OC)cc(cc1OC)c1cc(nn1c1ccc(cc1)S(=O)(=O)N)C(=O)OCCOc1ccc2c(c1)oc(=O)cc2 CC-36.mol

CCN(c1ccc2c(c1)oc(=O)c(c2)C(=O)NCCNC(=O)/C(=C/c1cc(OC)c(c(c1)OC)OC)/c1ccc(c(c1)OC)OC)CC CC-81.mol

Showing 1 to 4 of 4 entries

Previous 1 Next

[Filteredcum2csv](#)
[Filteredcum2sdf](#)

Download selected column as .sdf file

Download selected column

Supplementary Figure 3. Filter-based column selection and download the filtered data as .csv and .sdf files.

# SIDE BAR PANEL

A

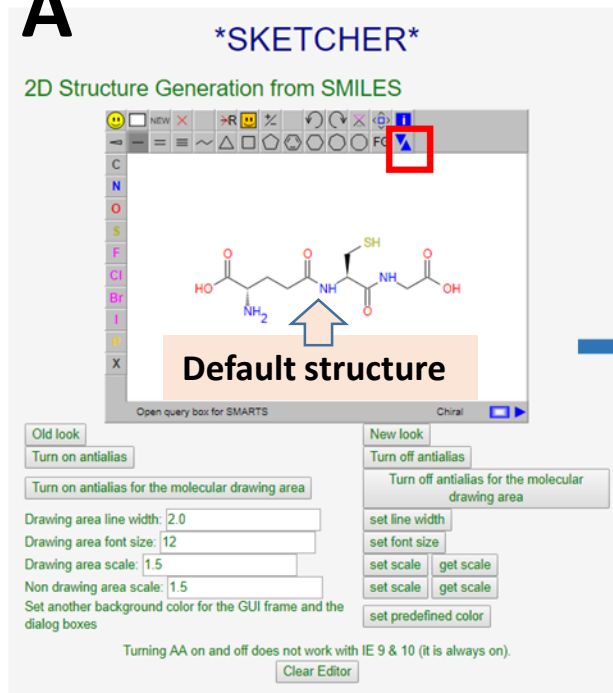

B

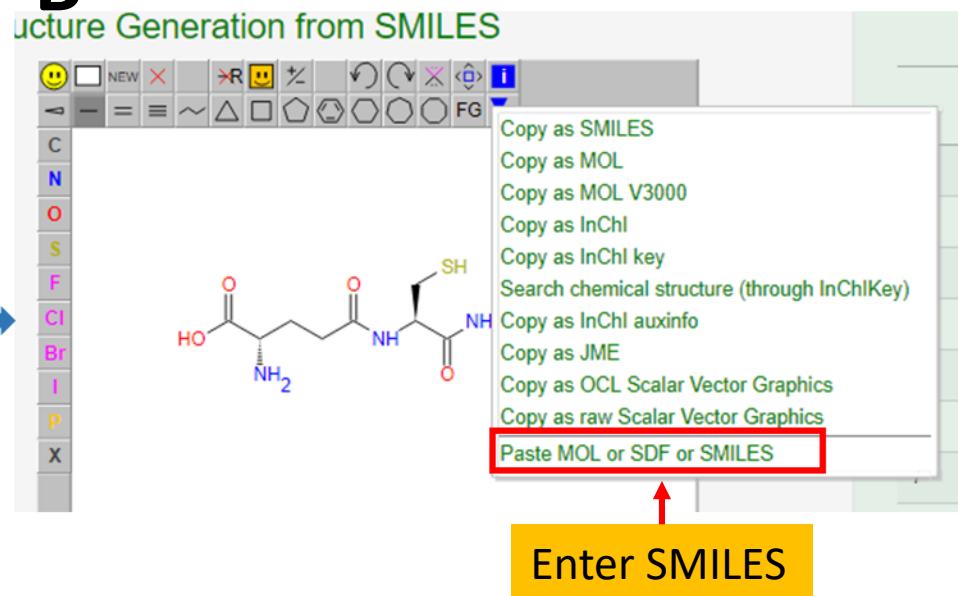

C

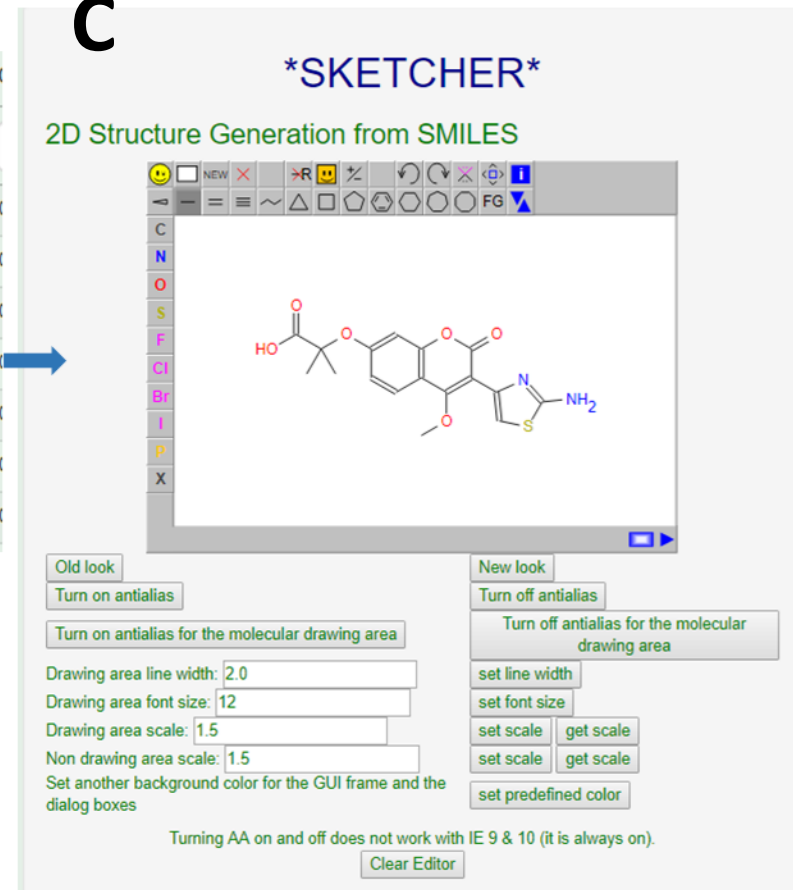

Structure of coumarin13

Supplementary Figure 4. The step-wise process of viewing the 2D structures of the compounds giving input as SMILES.

**A**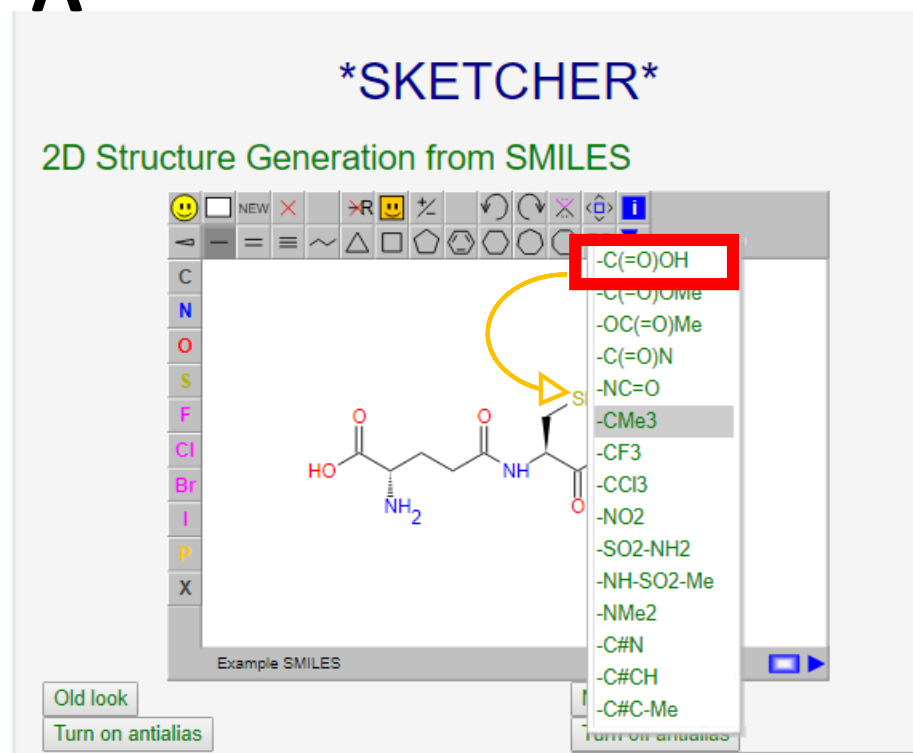**B**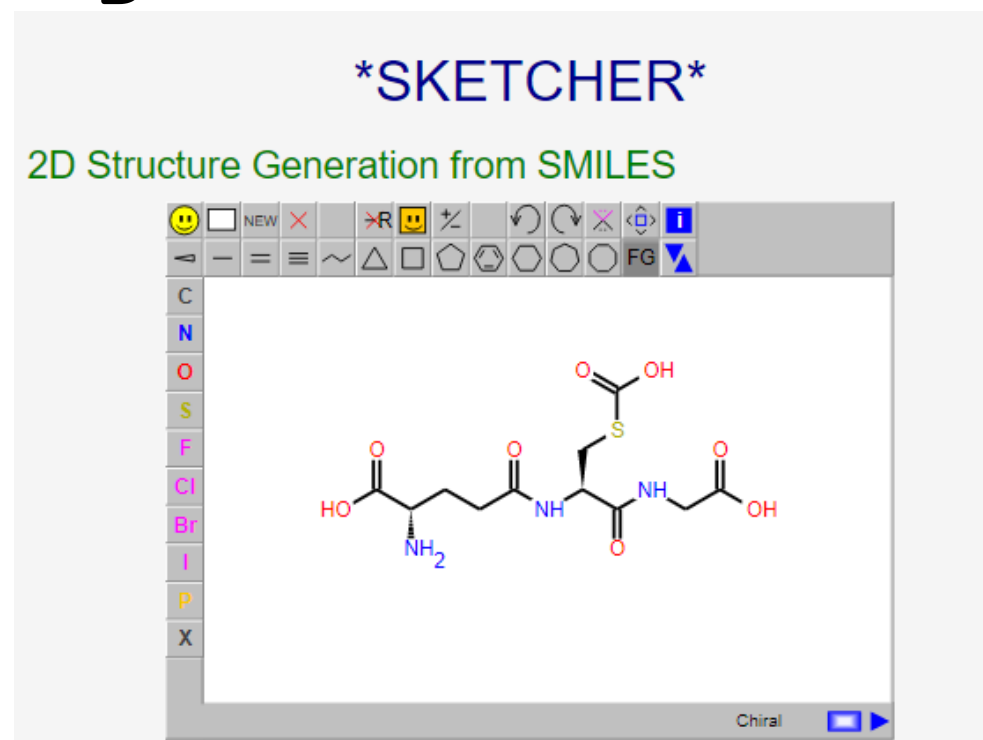

Supplementary Figure 5. Editing a given molecule.
